# Supplementary material
Source: Research Square preprint supplement (doi:10.21203/rs.3.rs-10108629/v1)
Supplement: Supplementary file 1 [file 9e1521562b045ed7eb74bc27.docx]

**4.8. Summary of signatures**

The five experimental signatures derive directly from different components of the theoretical framework:

| **Signature** | **Predicted value** | **Distinguishes from** |
| --- | --- | --- |
| Fano factor | 0.191 | Ising (0.25),  (0.20) |
| Topological entanglement entropy |  | Ising (0.3466) |
| Central charge |  | Luttinger (1), Ising (0.5), Potts (0.8) |
| Neutron exponent |  | Heisenberg (0.5), magnons (0 or 2) |
| RIXS exponent |  | Equals Fano factor |

**S0.6 Gap to higher excitations**

The energy gap  separating the three Fibonacci states from the next excitations is computed numerically. For the parameters above, the low-lying spectrum is:

| **State label** | **Energy (eV)** | **Dominant configuration (probability > 90%)** |  |
| --- | --- | --- | --- |
|  | -0.472 |  |  |
|  | -0.453 |  |  |
|  | -0.461 |  |  |
| Next (4th) | -0.352 | Mixed charge (, ) | various |

**S1.7 Parameter mapping from experimental measurements**

The parameters entering the anyonic Hubbard model are mapped from the parent Hamiltonian parameters as follows:

| **Anyonic parameter** | **Origin in parent Hamiltonian** | **Value (undoped, 20 GPa)** |
| --- | --- | --- |
|  | Inter-rung  hopping via virtual excitations | 0.50–0.52 eV |
|  | Inter-rung  hopping via virtual excitations | 0.15–0.16 eV |
|  | Nonlocal Coulomb repulsion (projected) | 1.0–1.2 eV |
|  | Inter-rung Coulomb repulsion | 0.1–0.2 eV |
|  | Atomic spin-orbit coupling (projected) | 0.0067 eV (6.7 meV) |
|  | Crystal field splitting (projected) | 0.18–0.25 eV |

**S2.2 Ionic radii and lattice distortion in the A-site**

The A-site in the Ruddlesden–Popper structure of has nine-fold oxygen coordination. Effective ionic radii (Shannon, 1976) for relevant ions in nine-fold coordination are:

| **Ion** | **Radius (Å)** | **Difference from La³⁺** |
| --- | --- | --- |
| La³⁺ | 1.216 | reference |
| Na⁺ | 1.24 | +2.0% |
| Sm³⁺ | 1.079 | -11.3% |
| Lu³⁺ | 0.977 | -19.7% |
| Y³⁺ | 1.075 | -11.6% |
| Dy³⁺ | 1.083 | -10.9% |

**S3.3 Results for the co-doped composition**

The extracted central charge values as a function of system size are:

| **System size  (rungs)** | **Extracted** | **Fit** | **Standard error** |
| --- | --- | --- | --- |
| 32 | 0.685 | 0.9982 |  |
| 48 | 0.692 | 0.9987 |  |
| 64 | 0.696 | 0.9991 |  |
| 96 | 0.698 | 0.9994 |  |
| 128 | 0.702 | 0.9996 |  |
