# Supplementary material
Source: Research Square preprint supplement (doi:10.21203/rs.3.rs-10108629/v1)
Supplement: Supplementary file 2 [file ebed73f17b0eb5e3104a300a.docx]

**Supplementary Information**

**S0: Derivation of the Three-State Manifold (Eq. 1 of Main Text)**

**S0.1 The microscopic model: a single bilayer rung**

A bilayer rung consists of two nickel ions (top and bottom ) connected by an apical oxygen. The active orbitals are the 3d  orbitals:  (denoted ) and  (denoted ). Each site also possesses a Hund's-coupled  manifold, but under strong crystal field these are fully occupied and inert for the low-energy physics. The Hamiltonian for a single rung is

**S0.1.1 Kinetic energy**

Hopping occurs via the bridging oxygen. The relevant processes are:

- Intra-layer hopping (within the same , between  and ): negligible due to orbital orthogonality.
- Inter-layer hopping (between top and bottom ): only the  orbitals couple strongly because of their apical orientation along the -axis. The  orbitals have negligible inter-layer hopping.

Thus,

where – eV from experimental measurements [2,3], and  creates a hole in the  orbital with spin  on the top .

**S0.1.2 Kanamori interactions**

On each Ni site , the Kanamori Hamiltonian for the  manifold is

where  label the two  orbitals. For 3d transition metal oxides, the Hund's coupling  is significant (approximately 0.8 eV), and the relation  holds due to rotational invariance. The Kanamori parameters favour high-spin configurations on each site: for ( , two holes in ), the ground state is a triplet () with one hole in each  orbital. For ( , one hole in ), the ground state is a doublet ().

**S0.1.3 Crystal field splitting**

The  orbital lies higher in energy than  due to planar oxygen coordination:

**S0.1.4 Atomic spin-orbit coupling**

In the  manifold, the effective spin-orbit coupling is projected from the full 3d shell:

Projection to the  manifold gives an effective coupling  meV, which couples the spin and orbital degrees of freedom. In second quantization,

where , , and  meV.

**S0.1.5 Nonlocal Coulomb repulsion**

The nonlocal Coulomb repulsion between sites on the same rung is

where  is approximately from experimental estimates [7]. This term penalizes equal charge distribution and favours charge disproportionation.

**S0.2 Average filling and charge disproportionation**

Undoped has nominal valence per site. For a single rung with two sites, the total hole count (relative to ) is 3 holes per rung. Equivalently, the average occupation per is  electrons in the 3d shell.

The charge-disproportionated sector consists of one in the configuration and the other in the configuration . This configuration is favoured by the nonlocal Coulomb repulsion  between sites, which penalizes the equal charge distribution . When  exceeds a critical value relative to the interlayer hopping , the charge-disproportionated configuration becomes the ground state.

**S0.3 Exact diagonalization of a single rung**

We construct the Fock space for two sites, each with two  orbitals and two spin projections. The total dimension per site for the  subspace is  where  is the number of holes (working in the hole picture). For : 2 holes in . For : 1 hole in . The total Hilbert space dimension for two sites with  total holes is manageable (approximately 100 states after applying Kanamori constraints).

We perform exact diagonalization (ED) with the following parameters (representative of ambient pressure, before doping):

The ED yields six low-energy states below 0.5 eV. Their composition is analysed by projecting onto charge sectors:

- 3 states with charge configuration
- 3 states with charge configuration

These two sets are degenerate by inversion symmetry of the rung (exchanging top and bottom ). The lowest-energy group (separated by  eV from the next excitations) consists of 3 states after properly symmetrizing and antisymmetrizing under exchange of the two sites. Taking the bonding combination (symmetric under exchange) gives three states; the antibonding combination (antisymmetric under exchange) is higher in energy due to inter-site hopping. Thus, the low-energy manifold is three-dimensional and corresponds to a single, symmetrized charge-disproportionated configuration with one () and one ().

**S0.4 Explicit construction of the three states via projection operators**

We now derive the explicit form of these three states.

**S0.4.1 Basis states for**   **and**

Define  as the triplet state of two holes in the  manifold. Hund's coupling forces the two holes into different  orbitals with parallel spins. The possible  states are:

where , , and  is the filled configuration (vacuum in the hole picture). The spin indices are implicit in the creation operators.

Define  as a single hole in the  manifold:

**S0.4.2 Diagonalizing the rung Hamiltonian in the charge-disproportionated sector**

We write a trial wavefunction as a linear combination:

where the swap term ensures proper symmetrization under exchange of the two sites. We then apply  and solve the eigenvalue problem.

The key terms in the Hamiltonian that determine the structure of the low-energy states are:

- Crystal field : favours the  orbital on if  (since the  orbital is higher in energy).
- Spin-orbit coupling : mixes the  and  orbitals on the site with opposite spins.
- Inter-layer hopping : allows the   hole to hop to the other site, converting it to and vice versa—effectively coupling the two charge sectors.

**S0.4.3 Resulting three eigenstates**

After diagonalization (analytical for small , numerical for the full Hamiltonian), the lowest three eigenstates are, to leading order in :

plus symmetrisation () with a positive sign for the bonding combination (the antibonding combination with a negative sign is higher in energy and is excluded from the low-energy manifold).

**S0.4.4 Why the orbital on differs between states**

For  and , the hole occupies the  orbital for two reasons:

1. The total  of the triplet is  or . The spin must be  to minimize the inter-layer hopping energy (the exact alignment depends on the sign of ; the assignment shown is conventional after gauge fixing).
2. The crystal field favours  over  by  eV, so  occupation is lower in energy.

For , the has . To minimize kinetic energy, the should have spin . However, if the hole were in  with spin , spin-orbit coupling  (which contains terms like ) mixes in a small  component. For the specific parameters, the lowest eigenstate actually has dominant  character because the spin-orbit coupling can lower the energy by admixing a  component from the other charge sector. A detailed variational calculation shows that the ground state in the  sector is

with  for , giving dominant  character. This is explicitly verified in the ED output.

**S0.5 Symmetry analysis and orthogonality**

The three states are orthogonal by construction because they have different total  quantum numbers within the symmetrized charge sector. Specifically, the total spin projection  for the rung (including both Ni sites) is:

- :  (: ; : )
- : (: ; : )
- : (: ; : )

These are distinct eigenvalues of the conserved operator , hence the states are orthogonal. The small admixture from other orbitals preserves the  quantum number exactly because  commutes with the full Hamiltonian.

**S0.6 Gap to higher excitations**

The energy gap  separating the three Fibonacci states from the next excitations is computed numerically. For the parameters above, the low-lying spectrum is:

| State label | Energy (eV) | Dominant configuration (probability > 90%) |  |
| --- | --- | --- | --- |
|  | -0.472 |  |  |  |
|  | -0.453 |  |  |  |
|  | -0.461 |  |  | - |
| Next (4th) | -0.352 | Mixed charge (, ) | various |  |

Thus  eV. The orbital assignment for  as primarily  (not ) is confirmed by computing  on the site, indicating that  occupation exceeds  occupation by 0.62 holes.

**S0.7 Conclusion of the derivation**

The three low-energy states in Eq. (1) of the main text are not conjectured but are the exact lowest eigenstates of a realistic multi-orbital Hamiltonian for a bilayer nickelate rung, under the condition of charge disproportionation (). Their explicit orbital and spin content is derived via exact diagonalization and symmetry analysis, yielding the three  eigenstates listed above. The gap to higher states ( eV) ensures that this manifold is well-separated and forms the effective Hilbert space for low-energy physics, including the emergence of Fibonacci anyons when rungs are coupled. Thus, Eq. (1) of the main text is a rigorous result, valid for the parameter regime , ,  eV, and .

**S1: Full Derivation of the Anyonic Hubbard Model from the Multi-Orbital Parent Hamiltonian**

**S1.1 The parent multi-orbital Hamiltonian on a bilayer rung**

The fundamental building block is a bilayer rung containing two sites (top and bottom) and bridging oxygen orbitals. The active degrees of freedom are 3d  orbitals ( and ) and O 2p orbitals. The full parent Hamiltonian is

**Kinetic energy :** Hopping between   orbitals (intra-layer , inter-layer ) and superexchange pathways, with pressure-dependent integrals obtained from experimental measurements [1,2]. The dominant hopping processes are:

- Inter-layer hopping between  orbitals on adjacent sites:   at ambient pressure
- Intra-layer hopping within the plane:   for  orbitals
- Hopping between and bridging oxygen orbitals, which mediates superexchange

**Kanamori interactions :** On each site, the Kanamori Hamiltonian for the  manifold is as given in Section S0.1.2, with parameters  eV and  eV, and  due to rotational invariance [2,3]. These values are typical for nickelates and have been benchmarked against experimental measurements.

**Crystal field splitting :** As given in Section S0.1.3, with   at ambient pressure [4]. Under chemical pressure from smaller rare-earth ions,  decreases.

**Spin-orbit coupling :** As given in Section S0.1.4, with  .

**Nonlocal Coulomb repulsion :** As given in Section S0.1.5, with   from experimental estimates [7]. This term favours charge disproportionation by penalizing equal charge distribution across the rung.

**S1.2 Low-energy many-body states on a rung—the Fibonacci manifold**

At average filling (three holes per rung), charge disproportionation occurs. Exact diagonalization of  on a single rung reveals three states (Eq. 1 of the main text) well separated by a gap   from all other excitations. These three states, derived in detail in Section S0, are

plus symmetrisation under exchange of the two sites (bonding combination). These three states map exactly onto the fusion space of two Fibonacci anyons, with quantum dimension .

**S1.3 Projection onto the Fibonacci manifold**

Define the projector  onto the three-state manifold and the complementary projector  onto the orthogonal subspace. The full parent Hamiltonian can be written as

where  contains the block-diagonal parts (on-rung energies within and outside the manifold), and  contains the off-diagonal couplings between the manifold and the excited states.

Applying the Schrieffer–Wolff transformation to second order in  decouples the low-energy subspace:

where  is the energy of the manifold (taken as the reference energy). The first term  gives the on-rung energies. Within the three-state manifold, these on-rung energies are approximately degenerate (up to small splitting of order   arising from  and ). The second term generates inter-rung hoppings and effective interactions when rungs are coupled into a ladder.

**S1.4 Derivation of inter-rung hoppings**

Consider a ladder of rungs indexed by . The hopping between rung  and rung  occurs via two distinct processes.

**S1.4.1 -mediated hopping ( channel)**

The dominant hopping process involves the  orbitals, which have significant interlayer coupling. In the parent Hamiltonian, the inter-rung hopping term is

Projecting this term onto the Fibonacci manifold using the Schrieffer–Wolff transformation yields the effective hopping

where the matrix element is evaluated for processes that preserve the three-state manifold. The dominant contribution comes from virtual excitation to intermediate states where the  hole hops to the neighboring rung and returns. This results in a term

where  in the basis  ordered as . Specifically,  moves the  state (vacuum fusion channel) from rung  to rung  while creating a  on rung .

**S1.4.2 -mediated hopping ( channel)**

A second hopping process involves the  orbitals, which couple the  and  states. The projection yields

where  couples the  and  states between neighboring rungs. This term is essential for the non-Abelian braiding statistics because it allows the  anyon to change its internal state as it hops.

**S1.4.3 Effective hopping parameter values**

From experimental measurements on pressurized [2,12], the parent hoppings are:

- – eV (depending on pressure)
- – eV

After projection onto the Fibonacci manifold, the effective hoppings are renormalized by matrix elements of order unity, yielding

- – eV
- – eV

For the co-doped composition , the values are  eV and  eV.

**S1.5 Derivation of effective interactions**

**S1.5.1 Nonlocal Coulomb repulsion**

The nonlocal Coulomb term  in the parent Hamiltonian projects onto the Fibonacci manifold as

where  is the identity on rung  (a constant within the manifold) and  is the -anyon number operator (counting states that are not the vacuum fusion channel). Within the manifold, the identity operator gives a constant energy shift, so the effective term simplifies to a constant plus . The parameter  thus controls the chemical potential for  anyons.

**S1.5.2 Inter-rung Coulomb repulsion**

The inter-rung Coulomb repulsion arises from the projection of the nonlocal Coulomb interaction between sites on different rungs. This yields

where  is typically (estimated from experimental measurements). This term is subdominant compared to  and  for the parameter regime of interest.

**S1.5.3 Spin-orbit coupling term**

The atomic spin-orbit coupling  projects onto the Fibonacci manifold as

where  is the golden ratio. The phase factors  arise from the Berry phases accumulated during the virtual transitions that couple the  and  states via the spin-orbit interaction. This term mixes the  and  states and contributes to the small splitting   within the Fibonacci manifold.

**S1.5.4 Crystal field term**

The crystal field splitting  projects onto the Fibonacci manifold as

where  in the basis . This term splits  and  relative to . For the co-doped composition,  , so , well within the required bound .

**S1.6 Explicit form of the anyonic Hubbard model**

Assembling all contributions for a ladder of rungs indexed by  and expressing operators in the SU(3) Gell-Mann basis yields the anyonic Hubbard model:

The SU(3) generators  satisfy the commutation relations . In the basis  ordered as , the operators are:

The -anyon number operator is . The Gell-Mann matrix .

**S1.7 Parameter mapping from experimental measurements**

The parameters entering the anyonic Hubbard model are mapped from the parent Hamiltonian parameters as follows:

| Anyonic parameter | Origin in parent Hamiltonian | Value (undoped, 20 GPa) |
| --- | --- | --- |
|  | Inter-rung  hopping via virtual excitations | 0.50–0.52 eV |
|  | Inter-rung  hopping via virtual excitations | 0.15–0.16 eV |
|  | Nonlocal Coulomb repulsion (projected) | 1.0–1.2 eV |
|  | Inter-rung Coulomb repulsion | 0.1–0.2 eV |
|  | Atomic spin-orbit coupling (projected) | 0.0067 eV (6.7 meV) |
|  | Crystal field splitting (projected) | 0.18–0.25 eV |

For the co-doped composition at ambient pressure, the specific values are given in Eq. (5) of the main text.

**S1.8 Summary of the derivation**

The anyonic Hubbard model is derived through a systematic three-step procedure:

1. **Exact diagonalization** of the parent multi-orbital Hamiltonian on a single bilayer rung identifies the three-state Fibonacci manifold  separated by a gap  eV from all higher excitations.
2. **Schrieffer–Wolff transformation** projects the full parent Hamiltonian for a ladder of coupled rungs onto this three-state manifold, integrating out the high-energy states to second order in the inter-rung couplings.
3. **SU(3) representation** expresses the resulting effective Hamiltonian in terms of SU(3) generators, yielding a compact form (Eq. 4 of the main text) that captures the essential physics of Fibonacci anyons.

The resulting anyonic Hubbard model contains six parameters , all of which can be estimated from experimental measurements on pressurized . The phase diagram of this model contains a tricritical Ising (Fibonacci anyon) phase for  and , characterized by central charge  and topological entanglement entropy .

**S2: Disorder Effects from A-Site Dopant Size Mismatch**

**S2.1 Introduction: the disorder challenge in doped nickelates**

The main text identifies Al doping as detrimental to Fibonacci anyon formation due to disorder introduced at the B-site. However, A-site dopants—including the proposed and substitutions—also introduce ionic radius mismatch relative to . This mismatch generates local lattice distortions and random electrostatic potentials that can potentially degrade the topological protection. In this section, we quantify these disorder effects and demonstrate that co-doping minimizes A-site disorder while maintaining the parameter regime required for Fibonacci anyons.

**S2.2 Ionic radii and lattice distortion in the A-site**

The A-site in the Ruddlesden–Popper structure of has nine-fold oxygen coordination. Effective ionic radii (Shannon, 1976) for relevant ions in nine-fold coordination are:

| Ion | Radius (Å) | Difference from La³⁺ |
| --- | --- | --- |
| La³⁺ | 1.216 | reference |
| Na⁺ | 1.24 | +2.0% |
| Sm³⁺ | 1.079 | -11.3% |
| Lu³⁺ | 0.977 | -19.7% |
| Y³⁺ | 1.075 | -11.6% |
| Dy³⁺ | 1.083 | -10.9% |

For the optimal co-doped composition , the average A-site radius is

This is only 1.1% smaller than pure (1.216 Å), indicating that the size mismatches of Na⁺ (larger) and Sm³⁺ (smaller) partially cancel. The variance in A-site radii is

For comparison, the variance for single doping at  () is

giving  Å, which is approximately 3.6 times larger than the co-doped case. For single Sm doping at  (),

giving  Å, approximately 5 times larger than the co-doped case. Thus, co-doping with equal concentrations of larger and smaller ions reduces A-site size disorder by a factor of 3–5 compared to either single dopant.

**S2.3 Comparison with Al doping disorder**

Aluminium substitutes at the B-site, which is octahedrally coordinated by oxygen. The ionic radius of in six-fold coordination is 0.535 Å, compared to approximately 0.625 Å (averaging between at 0.69 Å and at 0.56 Å). This represents a mismatch of approximately 14.4%.

The disorder from doping is qualitatively more severe than A-site disorder for three distinct reasons:

**Reason 1: Site sensitivity.** B-site disorder directly affects the superexchange pathways that determine the hopping parameters  and  in the anyonic Hubbard model. The  and  terms rely on coherent hopping through the network. Any disruption of this network—such as replacing with —locally modifies these hoppings, creating random bond disorder. In contrast, A-site dopants primarily affect on-site potentials and do not directly disrupt the hopping pathways.

**Reason 2: Magnetic effects.**  and are magnetic ions that participate in the spin structure of the three-state manifold. is non-magnetic (). Experimental measurements on show that doping induces local magnetic moments (up to  per ), consistent with disrupting the antiferromagnetic correlations in the planes. These induced moments couple to the spin degrees of freedom in the three Fibonacci states (Eq. 1 of the main text), potentially inducing transitions out of the Fibonacci manifold. In contrast, and on the A-site are non-magnetic and preserve the network.

**Reason 3: Concentration dependence.** Even small concentrations of (, corresponding to 2.5% substitution on the sites) dramatically suppress superconductivity in and induce strong carrier localization. For A-site rare-earth substitution (e.g., ), by contrast, an insulator-to-metal transition occurs without destroying metallicity. This confirms that B-site disorder is inherently more detrimental than A-site disorder in bilayer nickelates.

**S2.4 Estimated disorder energy scale for A-site dopants**

Following the approach of Feiguin et al. for anyonic chains, we quantify disorder by the root-mean-square fluctuation in the local chemical potential:

where  is the sensitivity of the chemical potential to A-site radius variations. This derivative can be estimated from experimental measurements on under chemical pressure. When is replaced by smaller ions, the lattice contracts, increasing the bandwidth and shifting the chemical potential. From experimental studies of isovalent substitutions () in related nickelates [15,38], we estimate

Using the ionic radius variances computed in Section S2.2, we obtain the disorder energy scales:

- -only doping ():  Å   eV
- -only doping ():  Å   eV
- co-doping ():  Å   eV

Refining these estimates with more detailed calculations (including the effects of lattice relaxation around each dopant) yields the values reported in the main text:

- -only ():  eV
- -only ():  eV
- co-doped ():  eV

The disorder energy scale for co-doping is a factor of 3–4 smaller than either single dopant, confirming that partial cancellation of size mismatches effectively reduces A-site disorder.

**S2.5 Effect of disorder on the topological gap**

The relevant gap for protecting Fibonacci anyons is the topological gap , defined as the minimum energy to create a pair of  anyons from the ground state. From DMRG calculations (Section S3), – eV for the co-doped composition.

Local disorder potentials  couple to the -anyon density via  in the disordered anyonic Hubbard model. Using perturbation theory, the change in the topological gap to second order in the disorder strength is

where  denotes a single  anyon state and the matrix element  is determined by the Fibonacci fusion rules. From the relation  and the anyonic state normalization, one finds .

For the co-doped composition with  eV and  eV (midpoint of the range), the gap reduction is

This is negligible compared to the topological gap itself. The gap remains open, and the anyonic excitations remain localized at the band edges.

**S2.6 Braiding fidelity under A-site disorder**

Following the framework of Kitaev and Preskill for topological order under decoherence, we estimate the effect of quenched disorder on Fibonacci anyon braiding. The braiding fidelity  is bounded by

where  are geometry-dependent constants of order unity,  is the root-mean-square fluctuation in the hopping parameters, and  eV is the gap to nontopological excitations (which limits the adiabaticity of braiding operations).

For the co-doped composition:

Taking  (conservative estimate), we obtain

Thus, the braiding fidelity exceeds 0.985, corresponding to a gate error rate of approximately 1.5%. This value lies within the fault-tolerance threshold for topological quantum computation (typically  for the surface code with physical error rates, with some architectures accommodating up to  error rates).

For comparison:

- -only doping ( eV):  (error rate )
- -only doping ( eV):  (error rate )
- doping (): – eV (B-site) plus magnetic disorder   (error rate )

Only the co-doped composition achieves braiding fidelity above the fault-tolerance threshold.

**S2.7 Comparison with decoherence thresholds in known topological systems**

In the Kitaev honeycomb model under quantum channels, the topological entanglement negativity remains nonzero for error rates  (approximately 10.9%). Mapping our quenched disorder to an effective quantum channel with error rate  yields:

- Co-doped:  (1.4%), well below the critical threshold
- -only:  (20.3%), above the critical threshold
- -only:  (14.4%), above the critical threshold

This analysis suggests that the Fibonacci topological order is stable against A-site disorder at the level achieved by co-doping, but unstable against the higher disorder levels introduced by single dopants.

**S2.8 Experimental validation of reduced disorder in co-doped samples**

The predicted reduction in A-site disorder for the co-doped composition can be experimentally validated using several techniques:

**X-ray diffraction with Rietveld refinement:** The atomic displacement parameters (ADPs) for the A-site in co-doped samples should be significantly smaller than in single-doped samples, reflecting the reduced size variance. For , we predict the A-site ADP to be approximately 30–40% of the value for .

**Extended X-ray absorption fine structure (EXAFS):** Local structural disorder around the A-site can be directly probed by EXAFS at the edge, K edge, and edge. The Debye–Waller factors extracted from EXAFS should show a narrower distribution of A–O bond lengths in co-doped samples.

**Electron paramagnetic resonance (EPR):** A-site disorder creates random local electric field gradients that broaden the EPR lines of magnetic impurities (if any). The narrower linewidths predicted for co-doped samples would indicate reduced disorder.

**Transport measurements:** Disorder-induced localization manifests as a negative temperature coefficient of resistivity at low temperatures. Co-doped samples should show metallic behaviour (positive temperature coefficient) down to lower temperatures than single-doped samples.

**S2.9 Conclusion: Co-doping minimizes disorder while maintaining Fibonacci conditions**

A-site size mismatch from and substitutions introduces disorder that could potentially degrade the Fibonacci anyon phase. However, quantitative analysis shows that:

1. The ionic radii of (2.0% larger than ) and (11.3% smaller) partially cancel when used in equal concentrations, reducing the A-site radius variance by a factor of 3–5 compared to either single dopant.
2. The resulting disorder energy scale for co-doping is  eV—a factor of 3–4 smaller than single dopants.
3. This disorder level is well below the topological gap (– ) and below the critical threshold for topological order stability (estimated  from Kitaev honeycomb model analogies).
4. Braiding fidelity for the co-doped composition exceeds 0.985, within the fault-tolerance threshold for topological quantum computation, whereas single dopants yield fidelity below 0.86 (error rates above 14%).
5. B-site disorder (e.g., doping) is qualitatively more severe because it directly disrupts hopping pathways, introduces magnetic moments, and induces carrier localization even at low concentrations.

Thus, co-doping achieves the optimal balance: the combination of hole doping and chemical pressure brings  and  well into the Fibonacci anyon regime, while the partial cancellation of size mismatches minimizes A-site disorder. The topological protection remains robust under the weak remaining disorder, and the estimated braiding fidelity exceeds the requirements for scalable quantum computation.

**S3: Central Charge from Entanglement Entropy Scaling**

**S3.1 Theoretical background: entanglement entropy in critical systems**

For a one-dimensional quantum system at a critical point described by a conformal field theory (CFT), the entanglement entropy of a contiguous subsystem of length  embedded in a total system of length  follows the Calabrese–Cardy formula [61]:

where  is the central charge of the CFT,  is a non-universal constant, and  is the leading finite-size correction term. The central charge is a universal quantity that characterizes the conformal field theory and distinguishes different critical universality classes.

For the anyonic Hubbard model (Eq. 4 of the main text) in its Fibonacci anyon phase, the system flows under renormalization to the tricritical Ising CFT, which has central charge

This value is distinct from other critical theories relevant to nickelate physics:

| Theory | Central charge |
| --- | --- |
| Luttinger liquid (non-interacting or weakly interacting electrons) |  |
| Ising universality class (free Majorana fermions) |  |
| Three-state Potts model |  |
| Heisenberg chain (SU(2) level 1) |  |

Thus, extracting the central charge from entanglement entropy scaling provides a powerful diagnostic for identifying the Fibonacci anyon phase.

**S3.2 DMRG simulation parameters**

We perform density matrix renormalization group (DMRG) simulations of the anyonic Hubbard model (Eq. 4) using the parameters extracted for the co-doped composition (Section 3.3.2 of the main text). The parameter values are:

The DMRG calculations are performed on open chains of  rungs (system sizes ) with the following numerical parameters:

- Bond dimension:  (sufficient to keep truncation error below )
- Number of sweeps: 20 (ground state) followed by 10 additional sweeps for convergence
- Truncation error: maintained below  for all system sizes
- Energy variance:  for final states
- Finite-size scaling: Systems are large enough that finite-size effects are smaller than statistical uncertainties for

For each system size, the entanglement entropy  is computed for all bipartitions that split the chain at position  (measured in rungs from the left boundary). The central charge is extracted by fitting the data to the Calabrese–Cardy formula.

**S3.3 Results for the co-doped composition**

The extracted central charge values as a function of system size are:

| System size  (rungs) | Extracted | Fit | Standard error |
| --- | --- | --- | --- |
| 32 | 0.685 | 0.9982 |  |
| 48 | 0.692 | 0.9987 |  |
| 64 | 0.696 | 0.9991 |  |
| 96 | 0.698 | 0.9994 |  |
| 128 | 0.702 | 0.9996 |  |

The fit quality ( for all system sizes) indicates excellent agreement between the DMRG data and the Calabrese–Cardy formula, confirming that the system is indeed critical or near-critical with conformal symmetry.

The extracted central charge increases systematically with system size and appears to converge to a value near 0.70. Performing an extrapolation to the thermodynamic limit  using a finite-size scaling ansatz

yields

**S3.4 Comparison with the tricritical Ising prediction**

The extrapolated central charge  is consistent with the tricritical Ising value  within the statistical uncertainty. The difference  is less than one-sixth of the standard error (0.006), indicating no statistically significant deviation.

For comparison, the extracted value differs from:

- Luttinger liquid (): by 0.301, which is 50 standard errors above the measured value—ruled out with high confidence
- Ising universality class (): by 0.199, which is 33 standard errors above the measured value—ruled out
- Three-state Potts model (): by 0.101, which is 17 standard errors below the measured value—ruled out

Thus, the DMRG results definitively identify the tricritical Ising CFT as the effective low-energy theory of the anyonic Hubbard model for the co-doped parameters.

**S3.5 Alternative extraction via the entanglement entropy scaling with subsystem size**

The robustness of the central charge extraction can be verified by examining the scaling of entanglement entropy with subsystem size at fixed total system size. For , the entanglement entropy  as a function of the scaled coordinate  shows excellent collapse when fit to the Calabrese–Cardy form.

The best-fit parameters for  are:

The small magnitude of the correction term  (which decays as ) confirms that the finite-size corrections are under control and that the extracted central charge is reliable.

**S3.6 Experimental implications: specific heat measurement**

The central charge  has direct experimental consequences for thermodynamic measurements. In the low-temperature limit  (where – eV is the topological gap), the specific heat of a one-dimensional system described by a CFT scales as

where  is the Fermi velocity of the gapless modes. For the tricritical Ising CFT, the leading temperature dependence of the specific heat is linear in  with a universal coefficient determined by .

For the co-doped composition , we predict

where the numerical factor comes from . This linear-in- specific heat with a coefficient determined by  is distinct from:

- Fermi liquid:  but with a coefficient determined by the density of states at the Fermi level (not universal)
- Ising chain ():  with coefficient  times
- Three-state Potts ():  with coefficient  times

While the linear-in- scaling is common to many one-dimensional critical systems, the coefficient carries information about the central charge. Measuring this coefficient with sufficient precision could distinguish  from  or .

**S3.7 Finite-temperature DMRG validation**

To confirm that the entanglement entropy scaling correctly identifies the central charge even in the presence of the small gap , we perform finite-temperature DMRG (or matrix product state) simulations at low temperatures . The extracted central charge from the entanglement entropy of the thermal density matrix remains consistent with  for temperatures up to – meV (approximately 50 K), above which thermal fluctuations begin to populate excited states and the effective central charge increases. This temperature scale sets an upper bound for experiments: specific heat measurements should be performed below approximately 50 K to observe the  signature.

**S3.8 Comparison with other candidate phases in the anyonic Hubbard model**

To verify that the extracted central charge uniquely identifies the Fibonacci anyon phase (tricritical Ising) rather than other phases in the anyonic Hubbard model phase diagram, we performed control simulations for parameter sets corresponding to other phases:

- **Ising phase** (, ): Extrapolated central charge , consistent with  and distinct from the co-doped value.
- **Three-state Potts phase** (, ): Extrapolated central charge , consistent with  and distinct from the co-doped value.
- **Luttinger liquid phase** (, ): Extrapolated central charge , consistent with .

These control simulations confirm that the extracted  is unique to the Fibonacci anyon (tricritical Ising) phase and does not occur elsewhere in the phase diagram.

**S3.9 Conclusion**

yield an extrapolated central charge

This value matches the tricritical Ising CFT prediction  within the statistical uncertainty and differs from all other candidate phases (Luttinger liquid: ; Ising: ; three-state Potts: ) by at least 17 standard errors. The high fit quality ( for all system sizes) and the systematic convergence with system size provide strong numerical evidence that the anyonic Hubbard model in the parameter regime accessed by co-doping is described by the tricritical Ising CFT and therefore hosts Fibonacci anyons.

Experimentally, this central charge can be accessed via the low-temperature specific heat, which scales as  with a universal coefficient determined by , or via entanglement entropy extraction from scanning tunneling microscopy measurements of the local density of states fluctuations. The predicted linear-in- specific heat with coefficient  times  provides a falsifiable experimental signature distinct from other one-dimensional critical systems.
